# Supplementary material for: Photodegradation behavior of nanosilica-filled PMMA composite: synergistic effect of mixed solvents and interfacial functional groups
Source: Research Square preprint supplement (doi:10.21203/rs.3.rs-6475289/v1), 2025-06-26
Supplement: Supplementary file 1 [file bc20055435ac9ff90999cf74.docx]

**Photodegradation behavior of** **nanosilica-filled PMMA composite: synergistic effect of mixed solvents and interfacial functional groups**

**Supplementary Material**

Zhiping Xu1, Liangchen Li1†, Ying Liu1, Rui Yang1*

1. Department of Chemical Engineering, Tsinghua University, Beijing, China

*Corresponding author(s), E-mail(s): yangr@mail.tsinghua.edu.cn

†These authors contributed equally to this work

**Table S1** lists the specific feeding information of Nano-SiO2 with different surface chemical modifications. According to the literature, the maximum density of hydroxyl groups that can be accommodated on the surface of silica is about 5 hydroxyl groups/nm1. Therefore, in this work, the required silane coupling agent additions were all calculated based on the molar ratio of surface silica hydroxyl groups to coupling agent molecules of 1:4.

**Table S1** Feeding information of silane coupling agents for SiO2 surfaces chemical modification

| **Silanes** | **Feed** | **Products** |
| --- | --- | --- |
| APTES | 12.6 mmol (2.95 ml) | SiO2@NH2 |
| EPPTMS | 12.6 mmol (2.78ml) | SiO2@Ep |
| MAPTMS | 12.6 mmol (2.84 ml) | SiO2@MA |
| MPTMS | 12.6 mmol (2.34 ml) | SiO2@SH |
| PhTMS | 12.6 mmol (2.36 ml) | SiO2@Ph |
| PTES | 12.6 mmol (2.91 ml) | SiO2@Propyl |
| OTMS | 12.6 mmo (3.26 ml) | SiO2@Octyl |


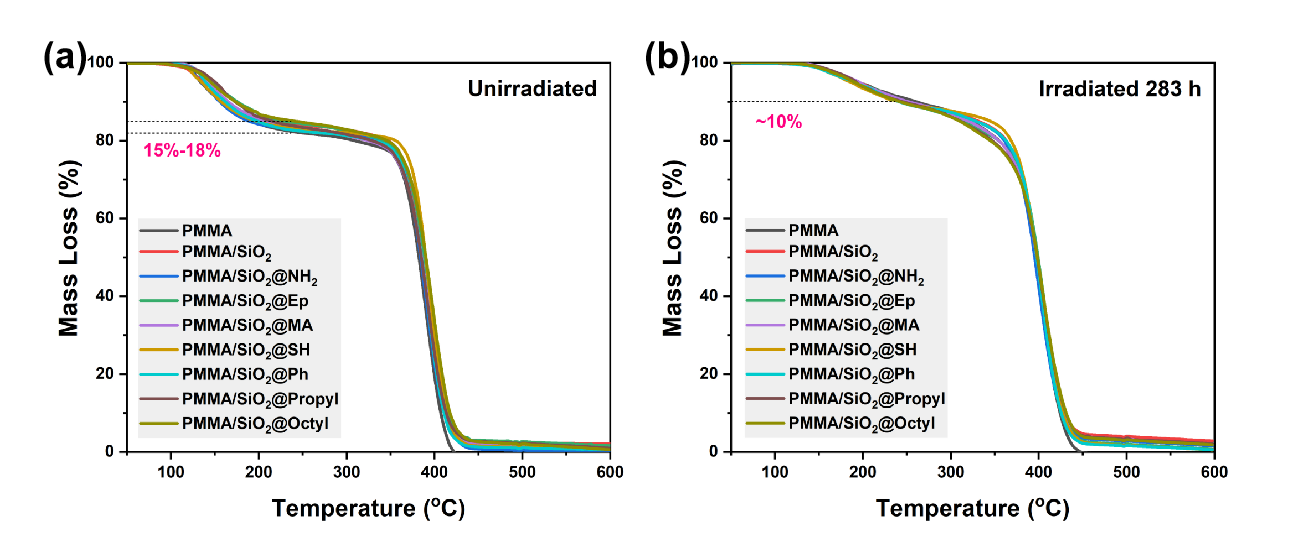


**Fig. S1** Thermogravimetric curves of PMMA and its SiO2 filled composite films before and after photooxidative aging: **(a)** before photooxidative aging; **(b)** after photooxidative aging for 283h


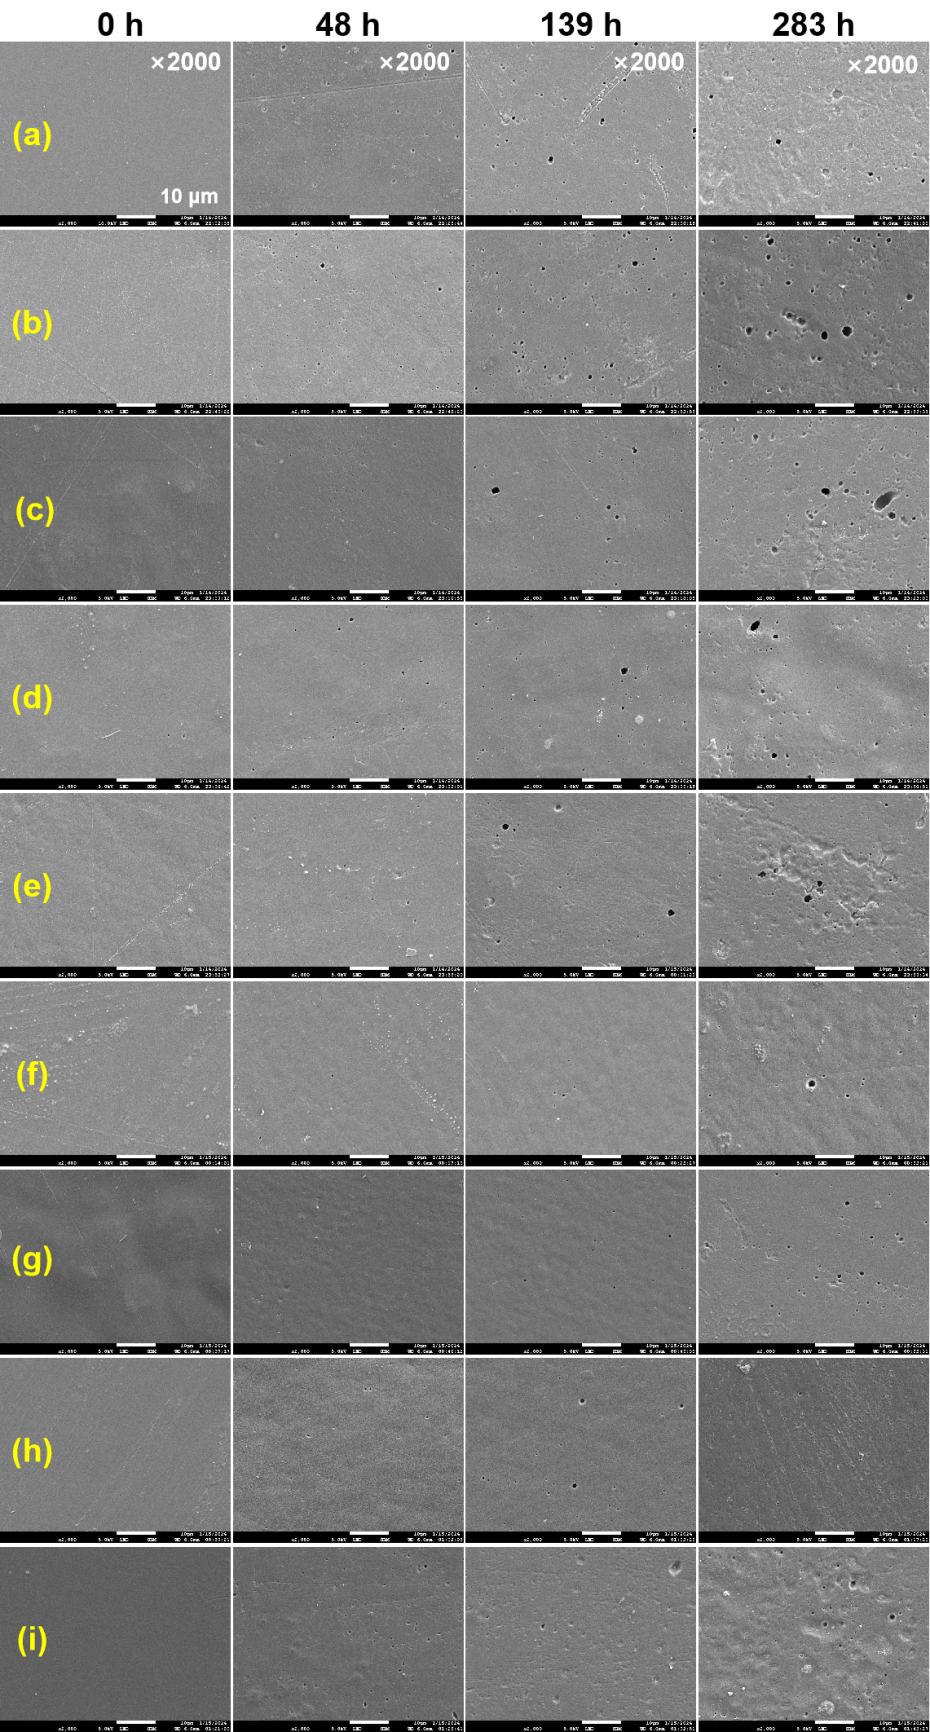


**Fig. S2** Surface morphology changes of the film during photooxidative aging: **(a)** PMMA; **(b)** PMMA/SiO2; **(c)** PMMA/SiO2@NH2; **(d)** PMMA/SiO2@Ep; **(e)** PMMA/SiO2@MA; **(f)** PMMA/SiO2@SH; **(g)** PMMA/SiO2@Ph; **(h)** PMMA/SiO2@Propyl; **(i)** PMMA/SiO2@Octyl

# References

1. Zhuravlev LT (2000) The surface chemistry of amorphous silica. Zhuravlev model. *Colloids Surf Physicochem Eng Asp* 173(1):1-38. https://doi.org/10.1016/S0927-7757(00)00556-2
